# Supplementary material for: In vivo CRISPR screens reveal SCAF1 and USP15 as drivers of pancreatic cancer
Source: PubMed Central journal article supplement (PMC11189927; doi:10.1038/s41467-024-49450-3), 2024-06-20
Supplement: 41467_2024_49450_MOESM1_ESM.pdf [file 41467_2024_49450_MOESM1_ESM.pdf]

## **Supplementary Information.**

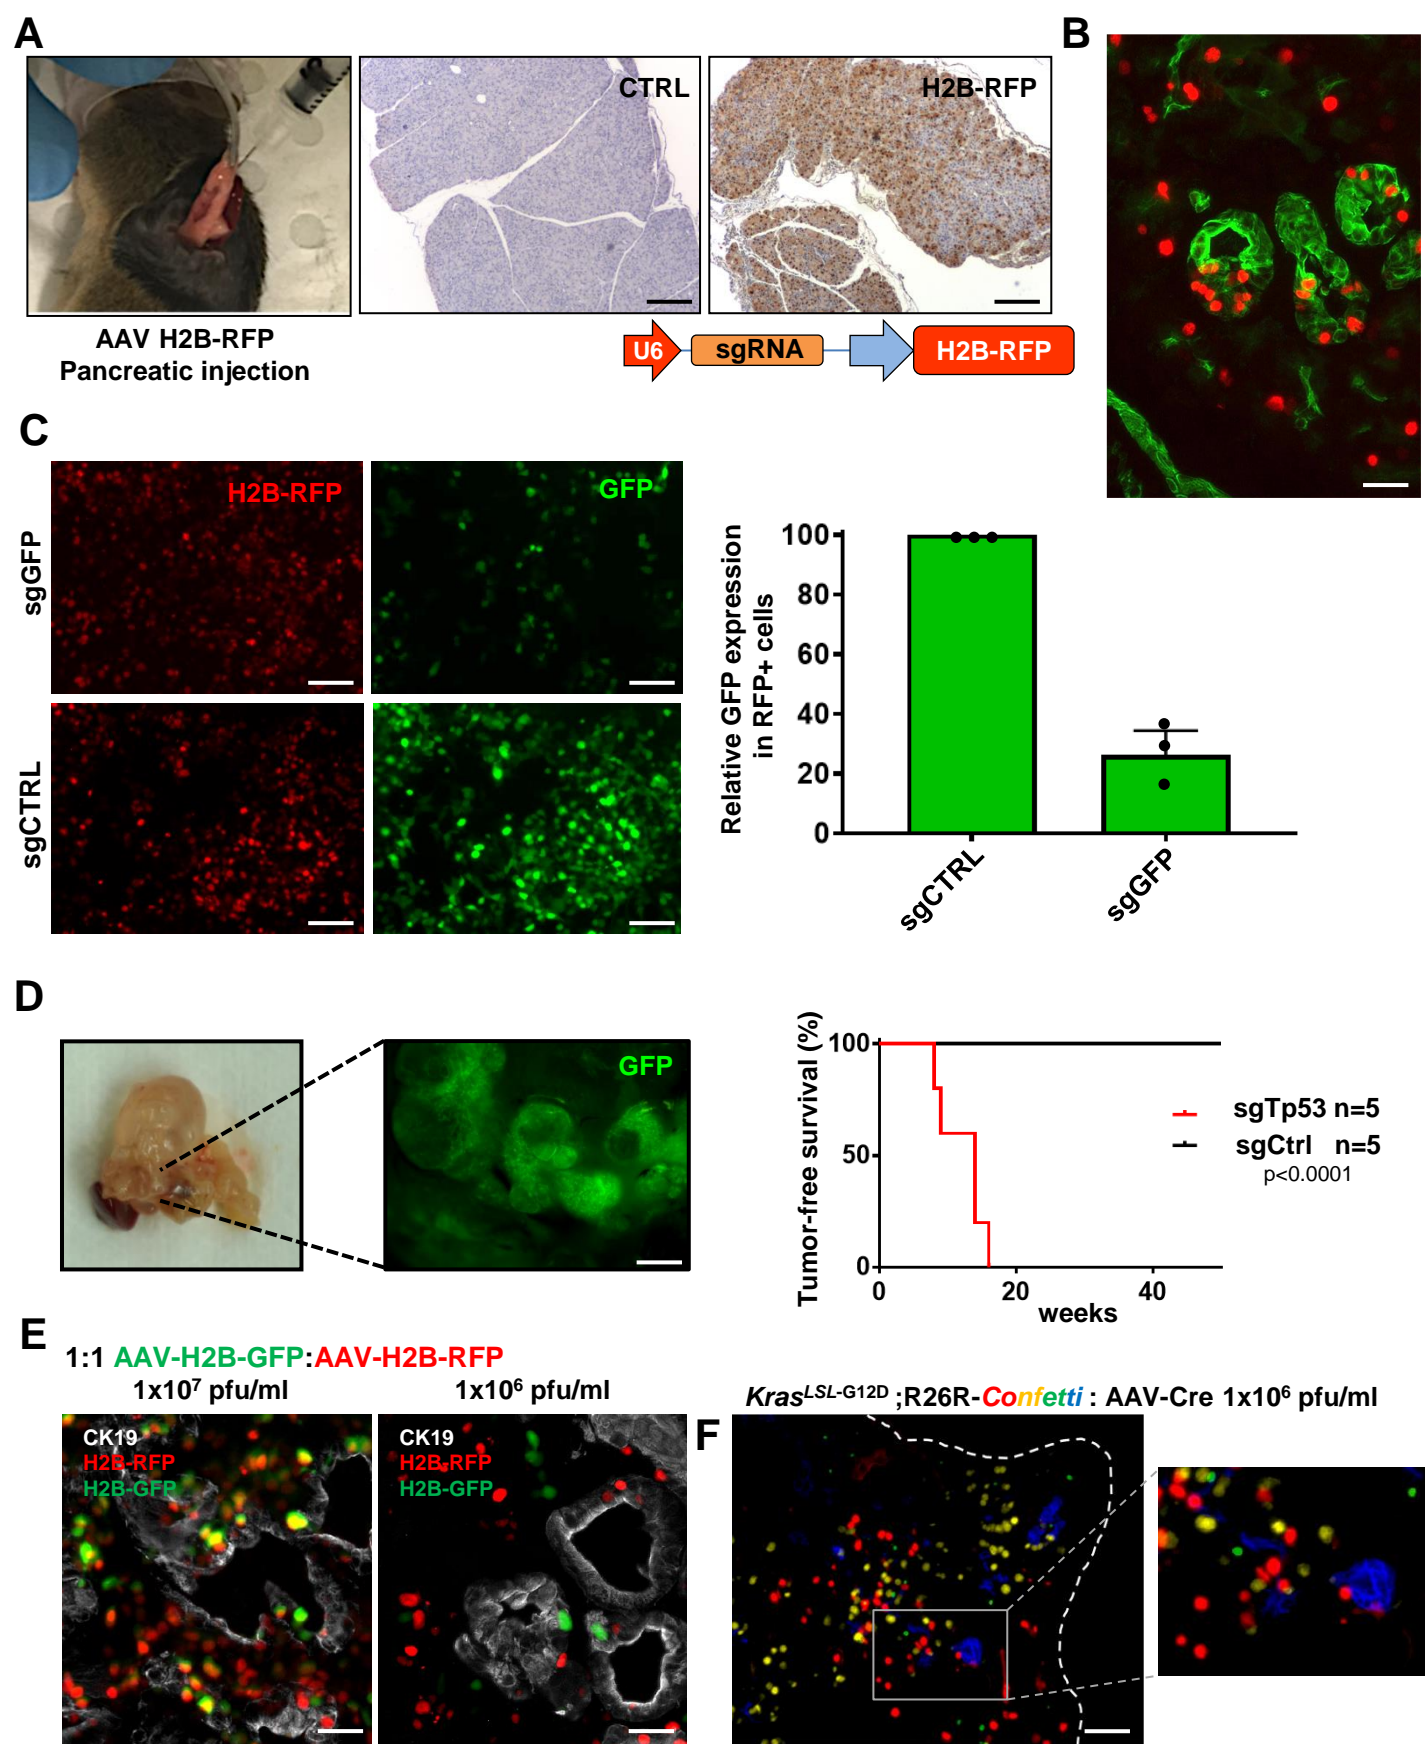

**Supplementary Figure 1. *In vivo* CIRPSR knock out efficiency in murine pancreas.**

**Supplementary Figure 1. *In vivo* CIRPSR knock out efficiency in murine pancreas.** **A**, Image of AAV injection into the pancreas. Representative immunohistochemistry of pancreas injected with control or AAV H2B-RFP. **B**, Representative immunofluorescence of Pdx1-Cre; LSL-KRas<sup>G12D</sup> epithelial cells transduced with AAV H2B-RFP. Scale bar 50  $\mu$ m. **C**, Representative images showing GFP and H2B-RFP expression in Pdx1-Cre;R26-LSL-Cas9-GFP cells transduced with sgGFP-H2B-RFP AAV or control non-targeting sgCTRL-H2B-RFP AAV. Bar graph showing the percent of GFP+/H2B-RFP+ double cells analysed using flow cytometry. Two sided T-test **D** Representative image of a Pdx1-Cre;LSL-KRas<sup>G12D</sup>;R26-LSL-Cas9-GFP pancreas injected with AAV-sgTp53. Tumor-free survival of PDX1-Cre;LSL-KRas<sup>G12D</sup>;LSL-Cas9-GFP mice transduced with a sgTp53 or sgCtrl. Log-Rank test (Mantel-Cox)**E**, Representative images of a pancreas transduced with an AAV-GFP/AAV-RFP 1:1 mixture showing cells transduced with GFP or RFP or double-transduced GFP+/RFP+ cells. The percentage of double positive cells increases at higher viral titre. **F**, Representative image of a reporter LSL-KRas<sup>G12</sup>;R26-LSL-Confetti pancreas infected with AAV-sgRNA-Cre.

**A**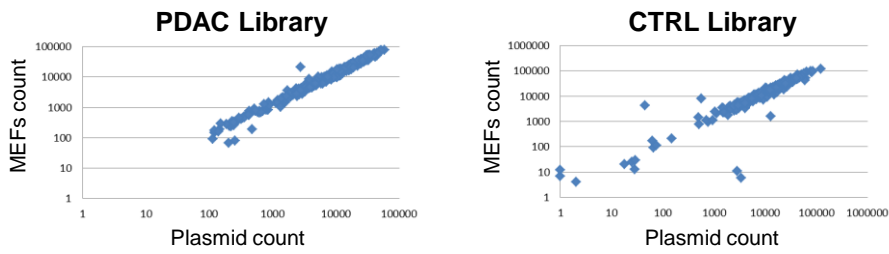**B**

**Liver metastasis**

**Lung metastasis**

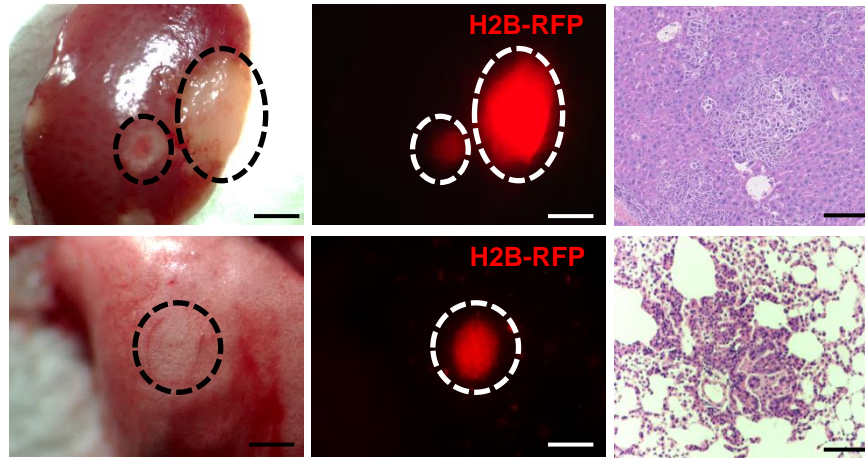**C**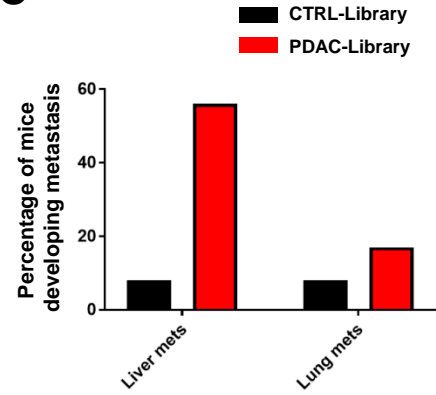**D**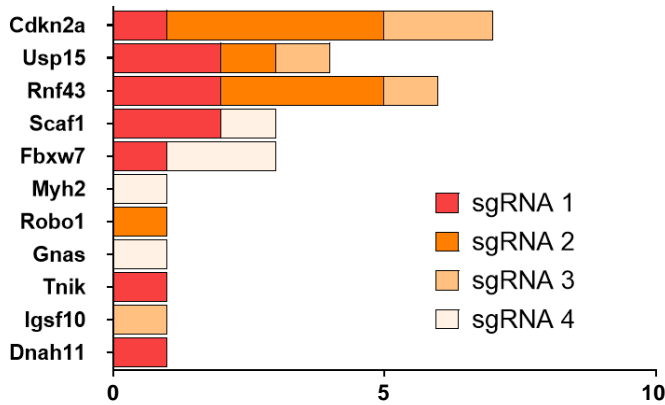**E**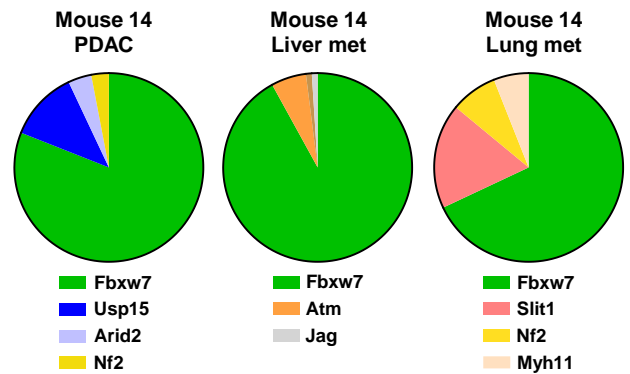**F**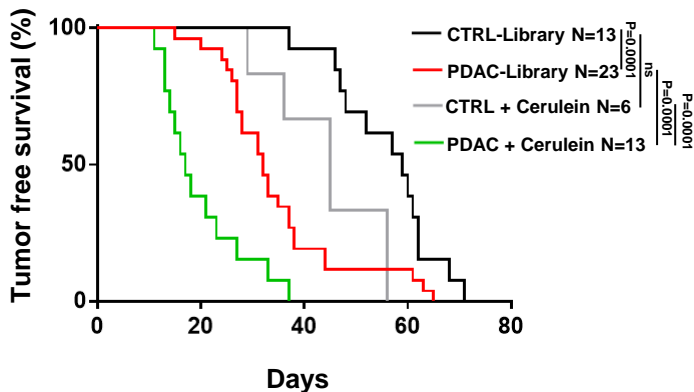**G**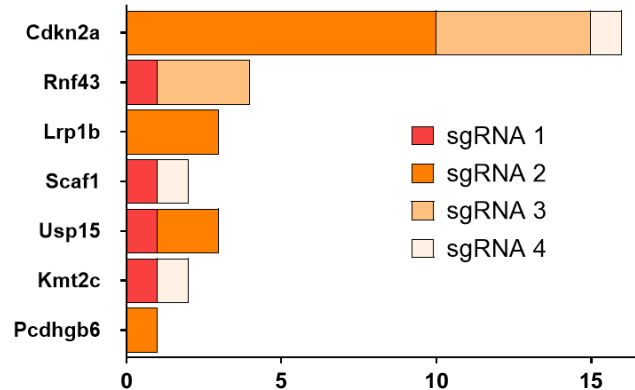

**Supplementary Figure 2. *In vivo* CRISPR screen**

**Supplementary Figure 2. *In vivo* pancreatic cancer CRISPR screen** **A.** Graph showing sgRNA correlation and representation for PDAC and CTRL libraries in plasmid DNA versus transduced MEFs DNA. Each dot represents a guide. **B.** Representative whole mount and immunofluorescence of PDAC-Library liver and lung metastasis showing H2B-RFP expression. Scale bar 3mm. Representative H&E images showing PDAC-Library liver and lung metastasis. Scale bar 100µm. **C.** Percentage of Pdx1-Cre;LSL-*KRas*<sup>G12D</sup>;LSL-*Cas9-GFP* mice transduced with indicated sgRNA library with metastatic disease. **D.** Bar graph showing putative tumor suppressor genes with sgRNAs enriched in metastatic lesions in the PDAC mouse model. **E.** Representative pie charts showing tumor suppressor genes with enriched sgRNAs in tumor DNA obtained from matched pancreatic tumor, liver and lung metastasis. **F.** Tumor-free survival of Pdx1-Cre;LSL-*KRas*<sup>G12D</sup>;LSL-*Cas9-GFP* mice transduced with the PDAC or CTRL library and treated with cerulein. Log-Rank test (Mantel-Cox) **G.** Bar graph showing putative tumor suppressor genes with enriched sgRNAs in tumor DNA obtained from cerulein PDAC mouse model.

**A**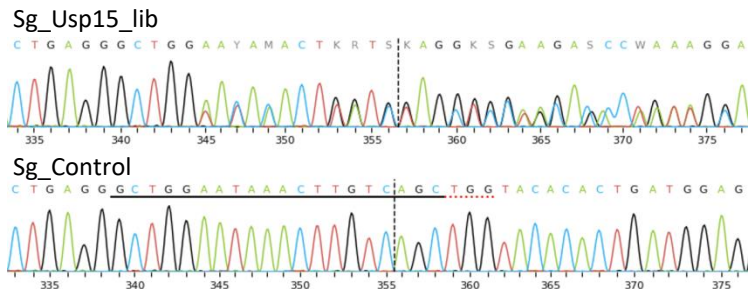**B**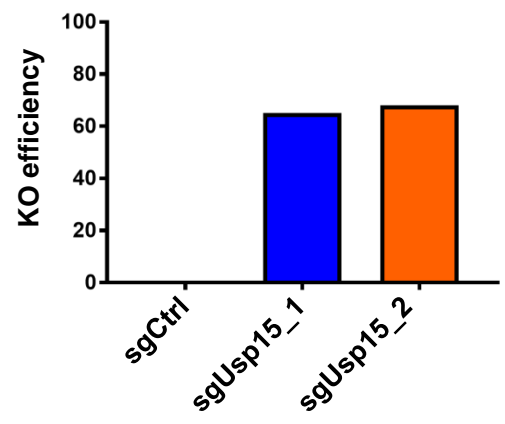**C**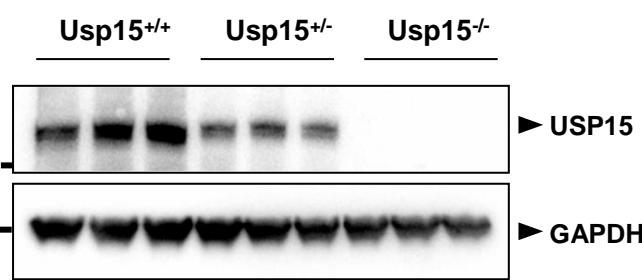**D**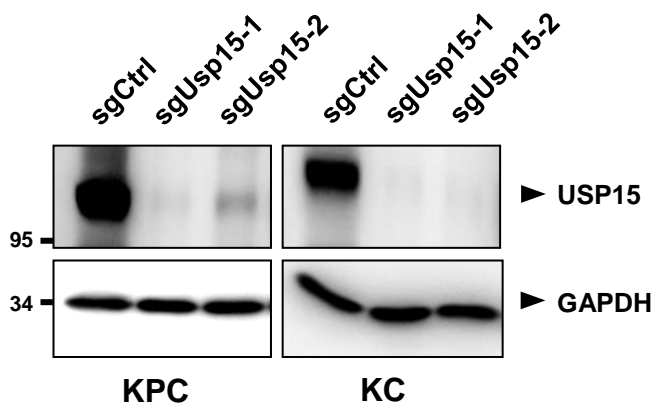**E**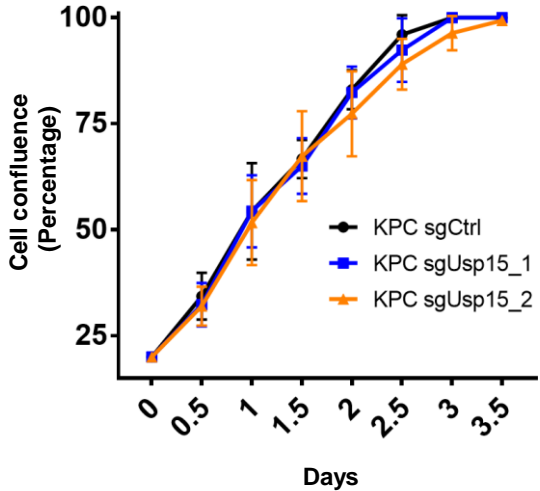**F**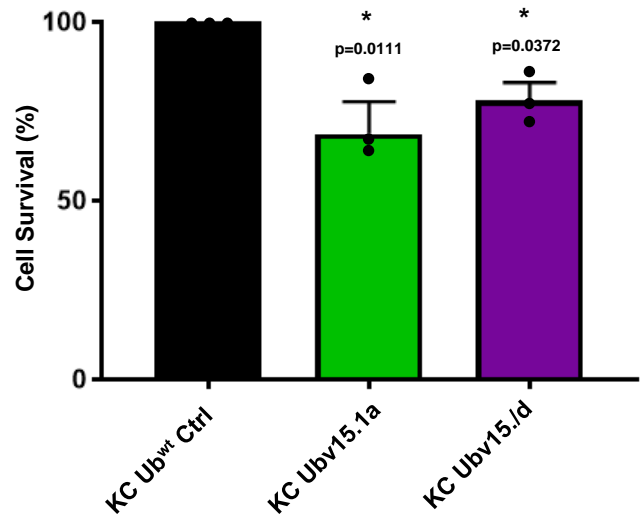**G**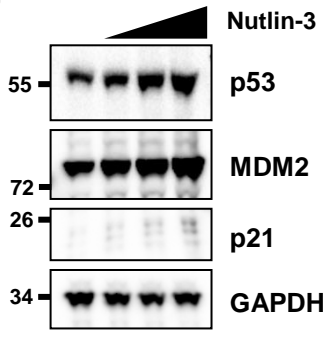

**Supplementary Figure 3. USP15 is a bona-fide PDAC suppressor**

### **Supplementary Figure 3. *USP15* is a *bona-fide* PDAC suppressor**

**A.** Representative sanger sequencing chromatogram of the DNA sequence from a sgUsp15-targeted sample compared to a control sample. **B.** Gene editing efficiency of sgUsp15. Efficiency was determined using sanger-sequencing data of PCR-amplified sgRNA target sites followed by Tracking of Indels by Decomposition (TIDE <https://tide.nki.nl>) algorithm on PDAC cells. **C.** Western blot analysis showing expression of Usp15 in Pdx1-Cre;LSL-*Kras*<sup>G12D</sup> mice with the indicated *Usp15* genotype. **D.** Western blot analysis showing loss of Usp15 protein expression after CRISPR-mediated knockout of Usp15 (two independent sgRNA in KPC cells). **E.** Cell growth curves of KPC cells transduced with sgCtrl or sgUsp15. Data are expressed as cell confluence percentage (%; mean  $\pm$  SD, n = 3 independent experiments). Two-way ANOVA, Dunnett's multiple comparison **F,** Cell survival of KC cells expressing different ubiquitin variants treated with 4 $\mu$ M of Olaparib (%; mean  $\pm$  SD, n = 3 independent experiments). Cell percentage normalized to control. Two-sided T-test **G,** Western blot analysis of p53, MDM2 and p21 in KC cells upon treatment with increasing concentrations of nutlin-3 (5, 10, 20  $\mu$ M; for 24 h).

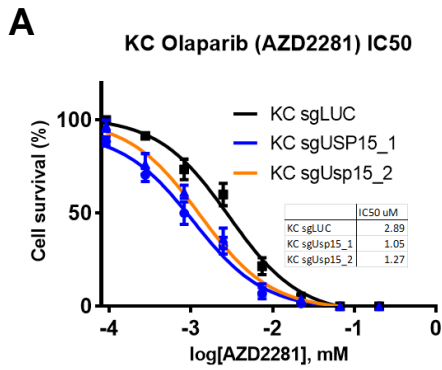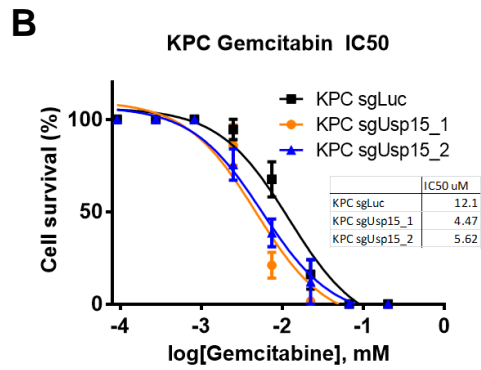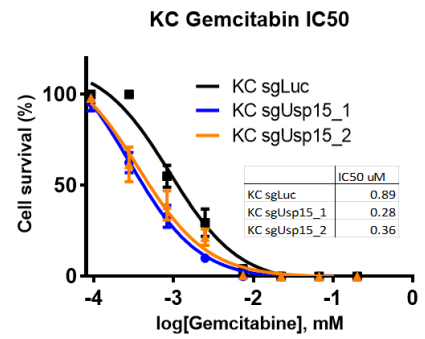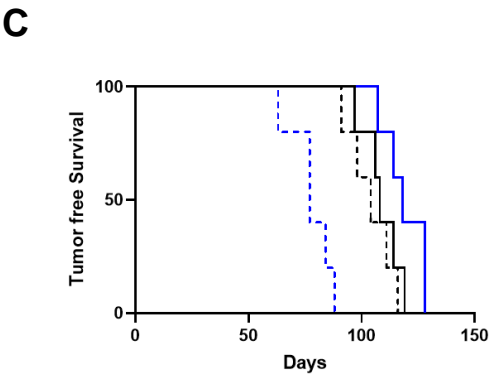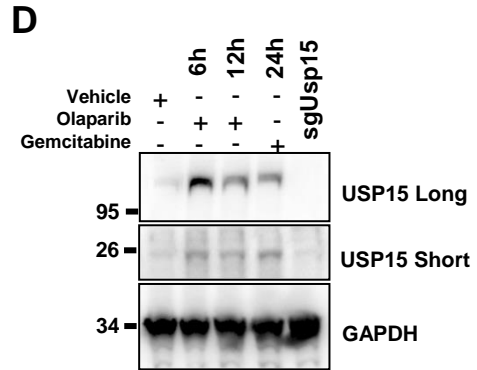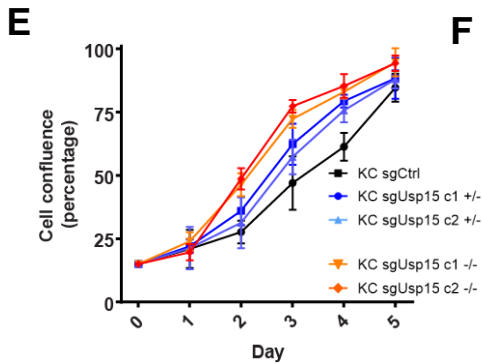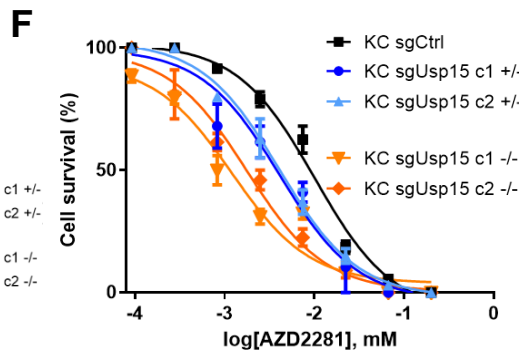

**Supplementary Figure 4. *USP15* regulates response to PARPi and Gemcitabine**



#### **Supplementary Figure 4. *USP15* regulates response to PARPi and Gemcitabine**

**A.** Dose-response curves for KC sgCtrl or sgUsp15 cells treated with the indicated concentration of olaparib in cell proliferation assay (%; mean  $\pm$  SD, n = 3 independent experiments). Two-way ANOVA, Dunnett's multiple comparison **B.** Dose-response curves for KPC and KC sgCtrl or sgUsp15 cells treated with the indicated concentration of Gemcitabine in cell proliferation assay (%; mean  $\pm$  SD, n = 3 independent experiments). Two-way ANOVA, Dunnett's multiple comparison **C.** Tumor-free survival of NSG mice orthotopically injected with sgCtrl or sgUsp15 KC cells treated daily with vehicle (DMSO) or olaparib (50 mg/kg; i.p.; 5 days on/2 days off). Log-Rank test (Mantel-Cox) **D.** Western blot analysis of USP15 isoform expression in KC cells treated with the indicated drug. **E.** Cell proliferation curves of clonal KC cells with the indicated genotype shown as percentage of cell confluence (%; mean  $\pm$  SD, n = 3 independent experiments). Two-way ANOVA, Dunnett's multiple comparison **F.** Dose-response curves for clonal KC cells treated with the indicated concentration of olaparib in cell proliferation assay (%; mean  $\pm$  SD, n = 3 independent experiments). Two-way ANOVA, Dunnett's multiple comparison.

**A**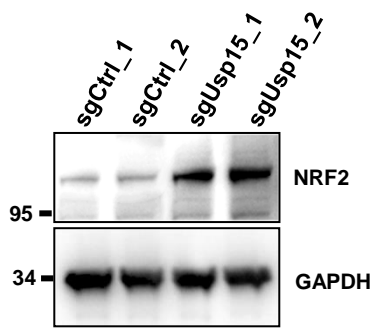**B**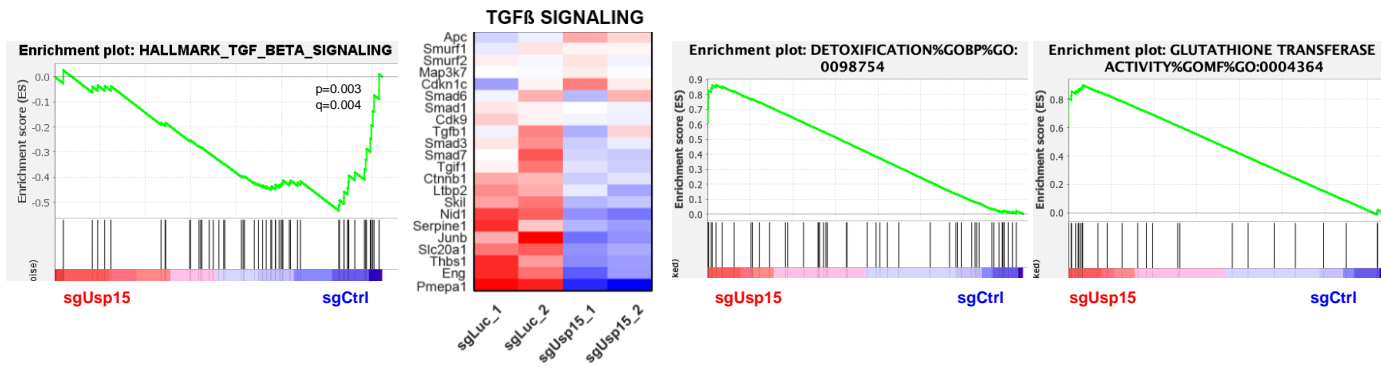**C**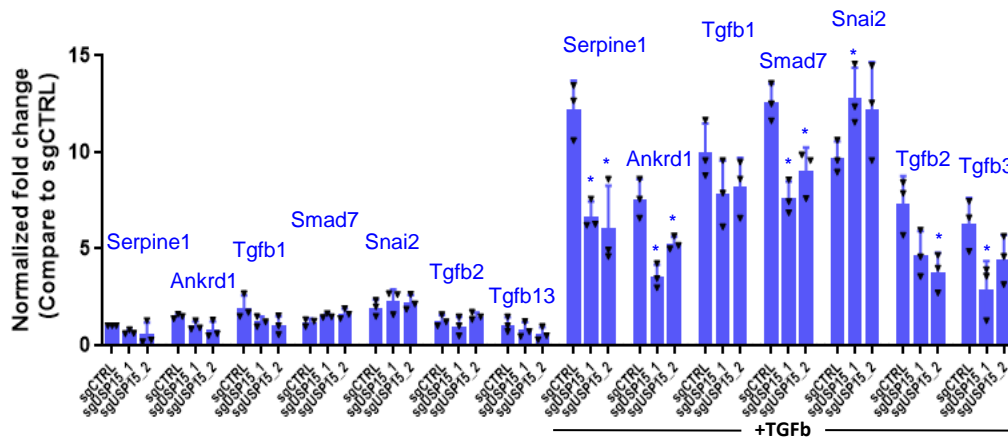**D**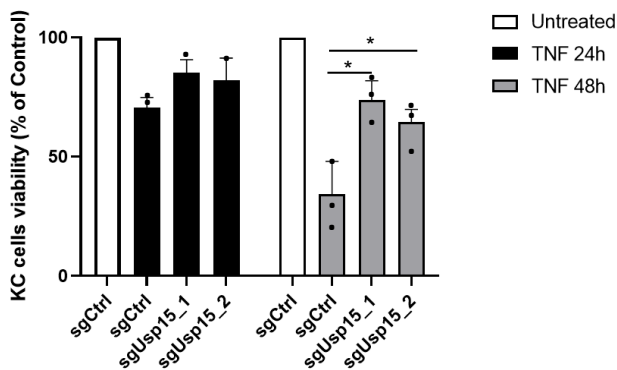**E**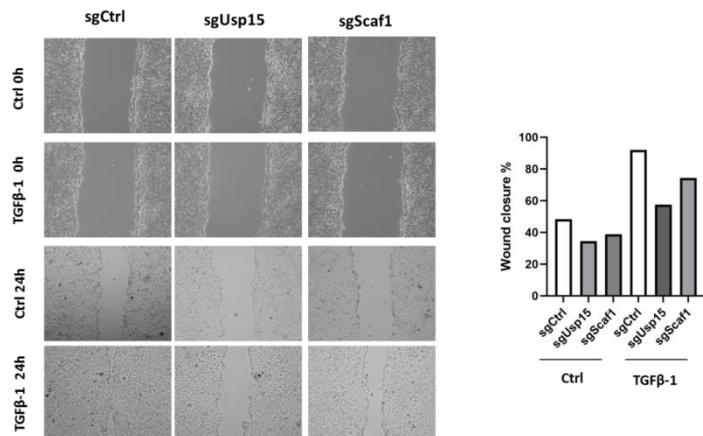

**Supplementary Figure 5. USP15 regulates NRF2, TGFb and TNF $\alpha$  signaling**

**Supplementary Figure 5. USP15 regulates NRF2, TGF $\beta$  and TNF $\alpha$  signalling**

**A**, Western blot analysis of NRF2 expression in KC cells transduced with AAV-sgCtrl or AAV-sgUsp15. **B**, GSEA plots and Heatmap of log<sub>2</sub> counts per million for TGF $\beta$  related genes in KC cells. GSEA enrichment plots of the indicated differentially expressed pathways associated with loss of Usp15. **C**, Expression levels of genes related to TGF $\beta$  signalling assessed by RT-qPCR. Results were normalized with Gapdh and are expressed in fold change to CTR (mean  $\pm$  SEM, n = 3 independent experiments). Cells were incubated with 10 ng/mL TGF $\beta$  -for 30 min. Two-sided T-test (Serpine1 p=0.021/p=0.034; Ankrd1 p=0.028/p=0.037; Smad7 p=0.037/p=0.042; Snail2 p=0.046; Tgfb2 p=0.042/p=0.033; Tgfb3 p=0.047). **D**, TNF- $\alpha$  induced cell death is mediated by USP15. KC sgCtrl and sgUsp15 cells were treated with 100 ng/ml TNF- $\alpha$  for the indicated time and cell viability was determined by PrestoBlue™ Cell Viability Reagent. (mean  $\pm$  SEM, n = 3 independent experiments). Two-sided T-test (p=0.0336) **E**, TGF-b1-induced migration depends on USP15. Migration of KC sgCtrl, sgUsp15 and sgScaf1 cells treated with TGF-b1 (10 ng/ml; 24h) was assessed using a wound healing scratch assay. Phase contrast microscopy images of the cells were taken at 0h and 24h. Wound healing closure was quantified as a percentage of the remaining wound area relative to each initial wound area after 24h using imageJ.

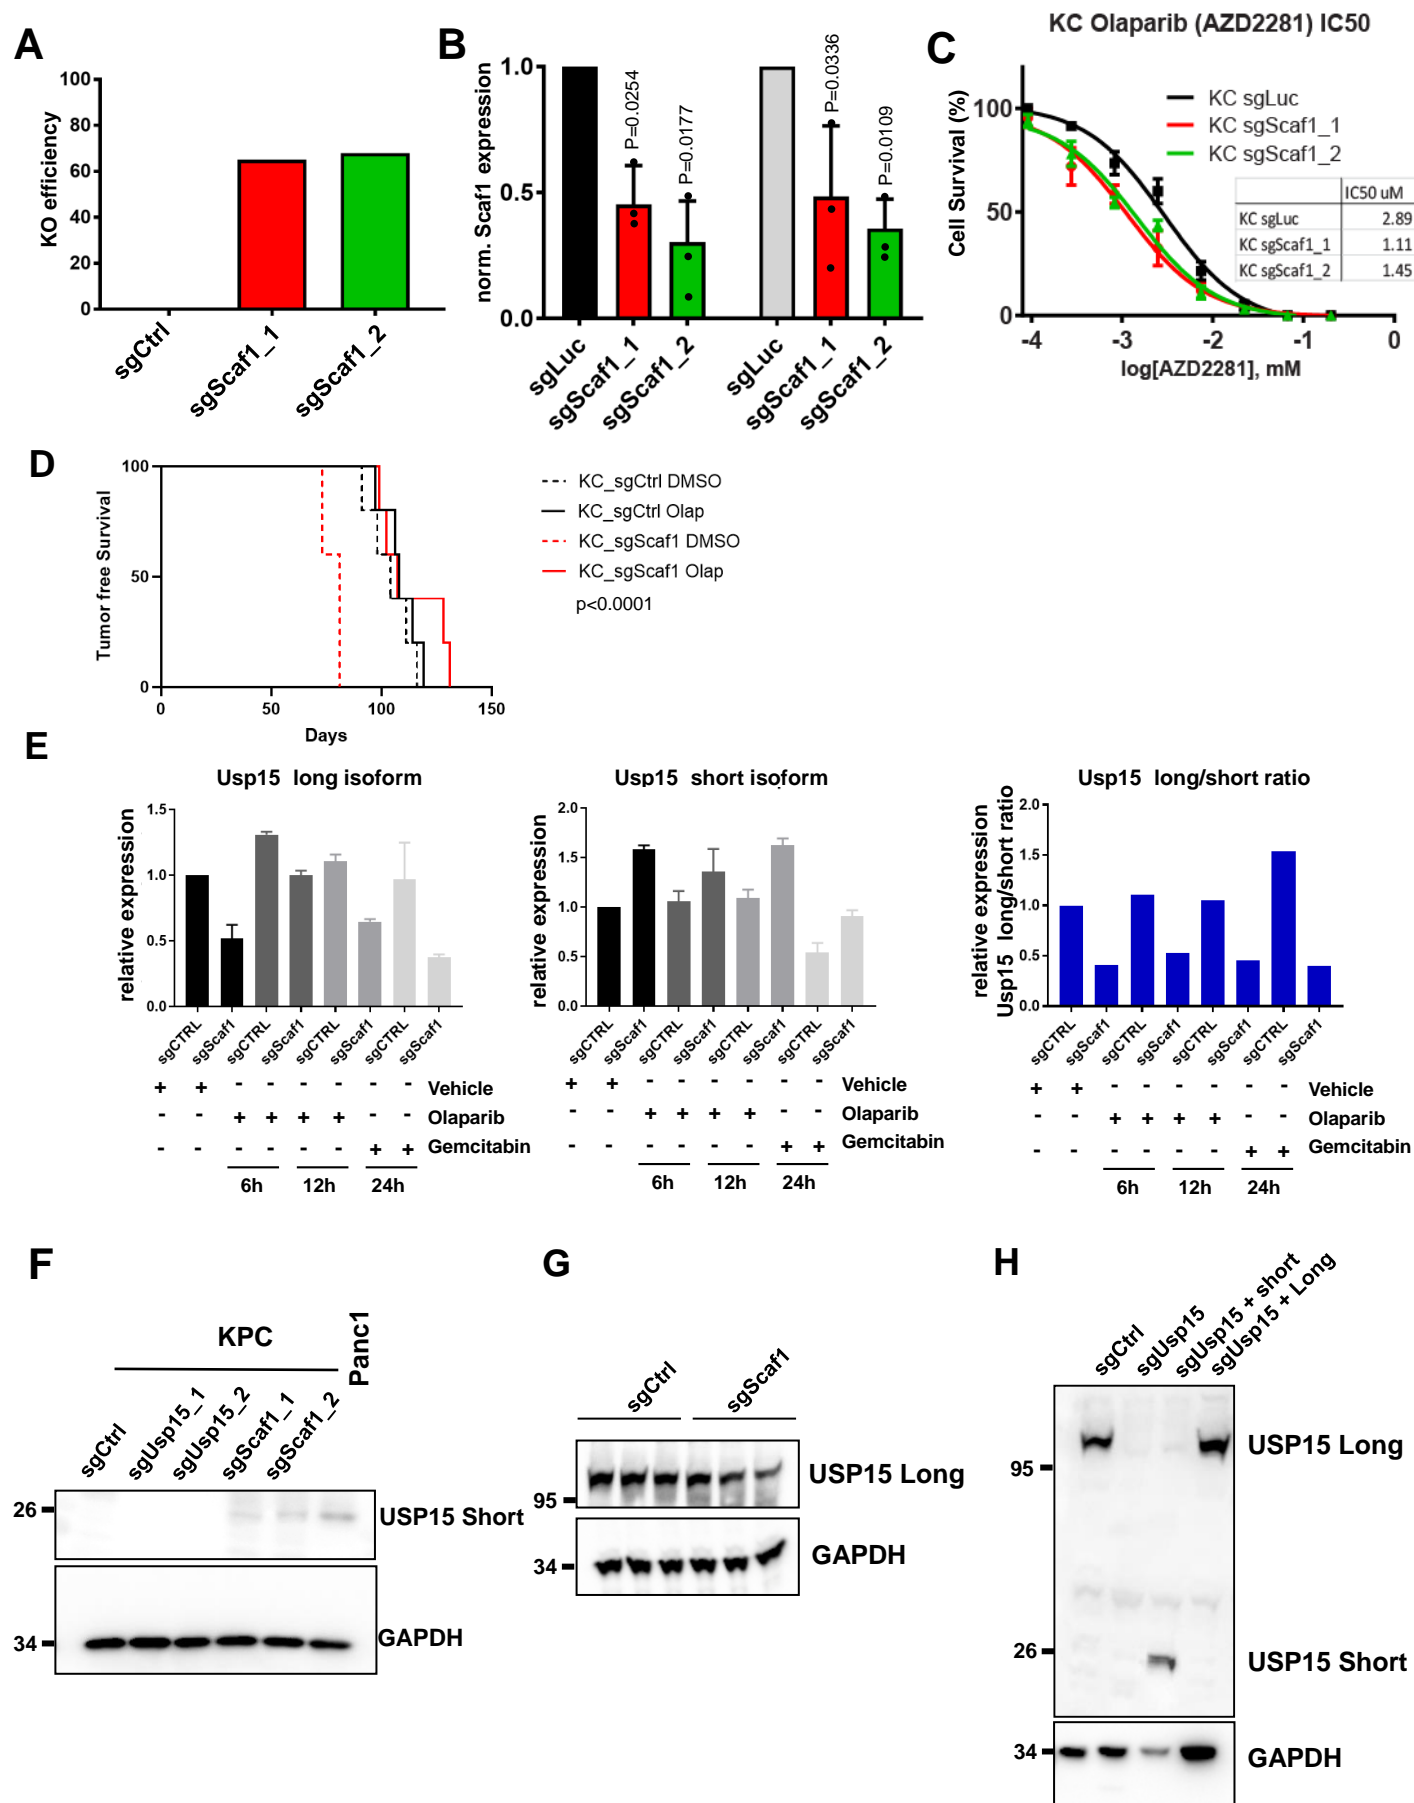

Supplementary Figure 6. *SCAF1* is a bona-fide PDAC suppressor

### **Supplementary Figure 6. SCAF1 is a *bona-fide* PDAC suppressor**

**A.** Gene editing efficiency of sgRNAs targeting Scaf1. **B.** RT-PCR analysis of Scaf1 expression in KPC and KC cells transduced with the indicated sgRNAs. **C.** Dose-response curves for KC sgCtrl or sgScaf1 cells treated with the indicated concentration of Olaparib in cell proliferation assay (%; mean  $\pm$  SD, n = 3 independent experiments). two-way ANOVA, Dunnett's multiple comparison **D.** Tumor-free survival of NSG mice after orthotopic injection of sgCtrl or sgScaf1 KC cells treated daily with vehicle (DMSO) or olaparib. (50 mg/kg; i.p.; 5 days on/2 days off) Log-Rank test (Mantel-Cox) **E.** Quantification of Usp15 long and short isoform expression levels in cells transduced with the indicated sgRNAs and treated with the listed drugs (n=3, mean  $\pm$  SD)  $P \leq 0.05$  **F.** Western blot analysis of short USP15 expression in KPC cells transduced with AAV-sgCtrl, AAV-sgUsp15 or AAV-sgScaf1. Human Panc1 cells are shown as a control. **G.** Western blot analysis showing expression of Usp15 in whole tumor extract of sgCtrl and sgScaf1 mice. **H.** Western blot analysis of USP15 isoform expression in KC cells transduced with the indicated sgRNAs and USP15 expression constructs.

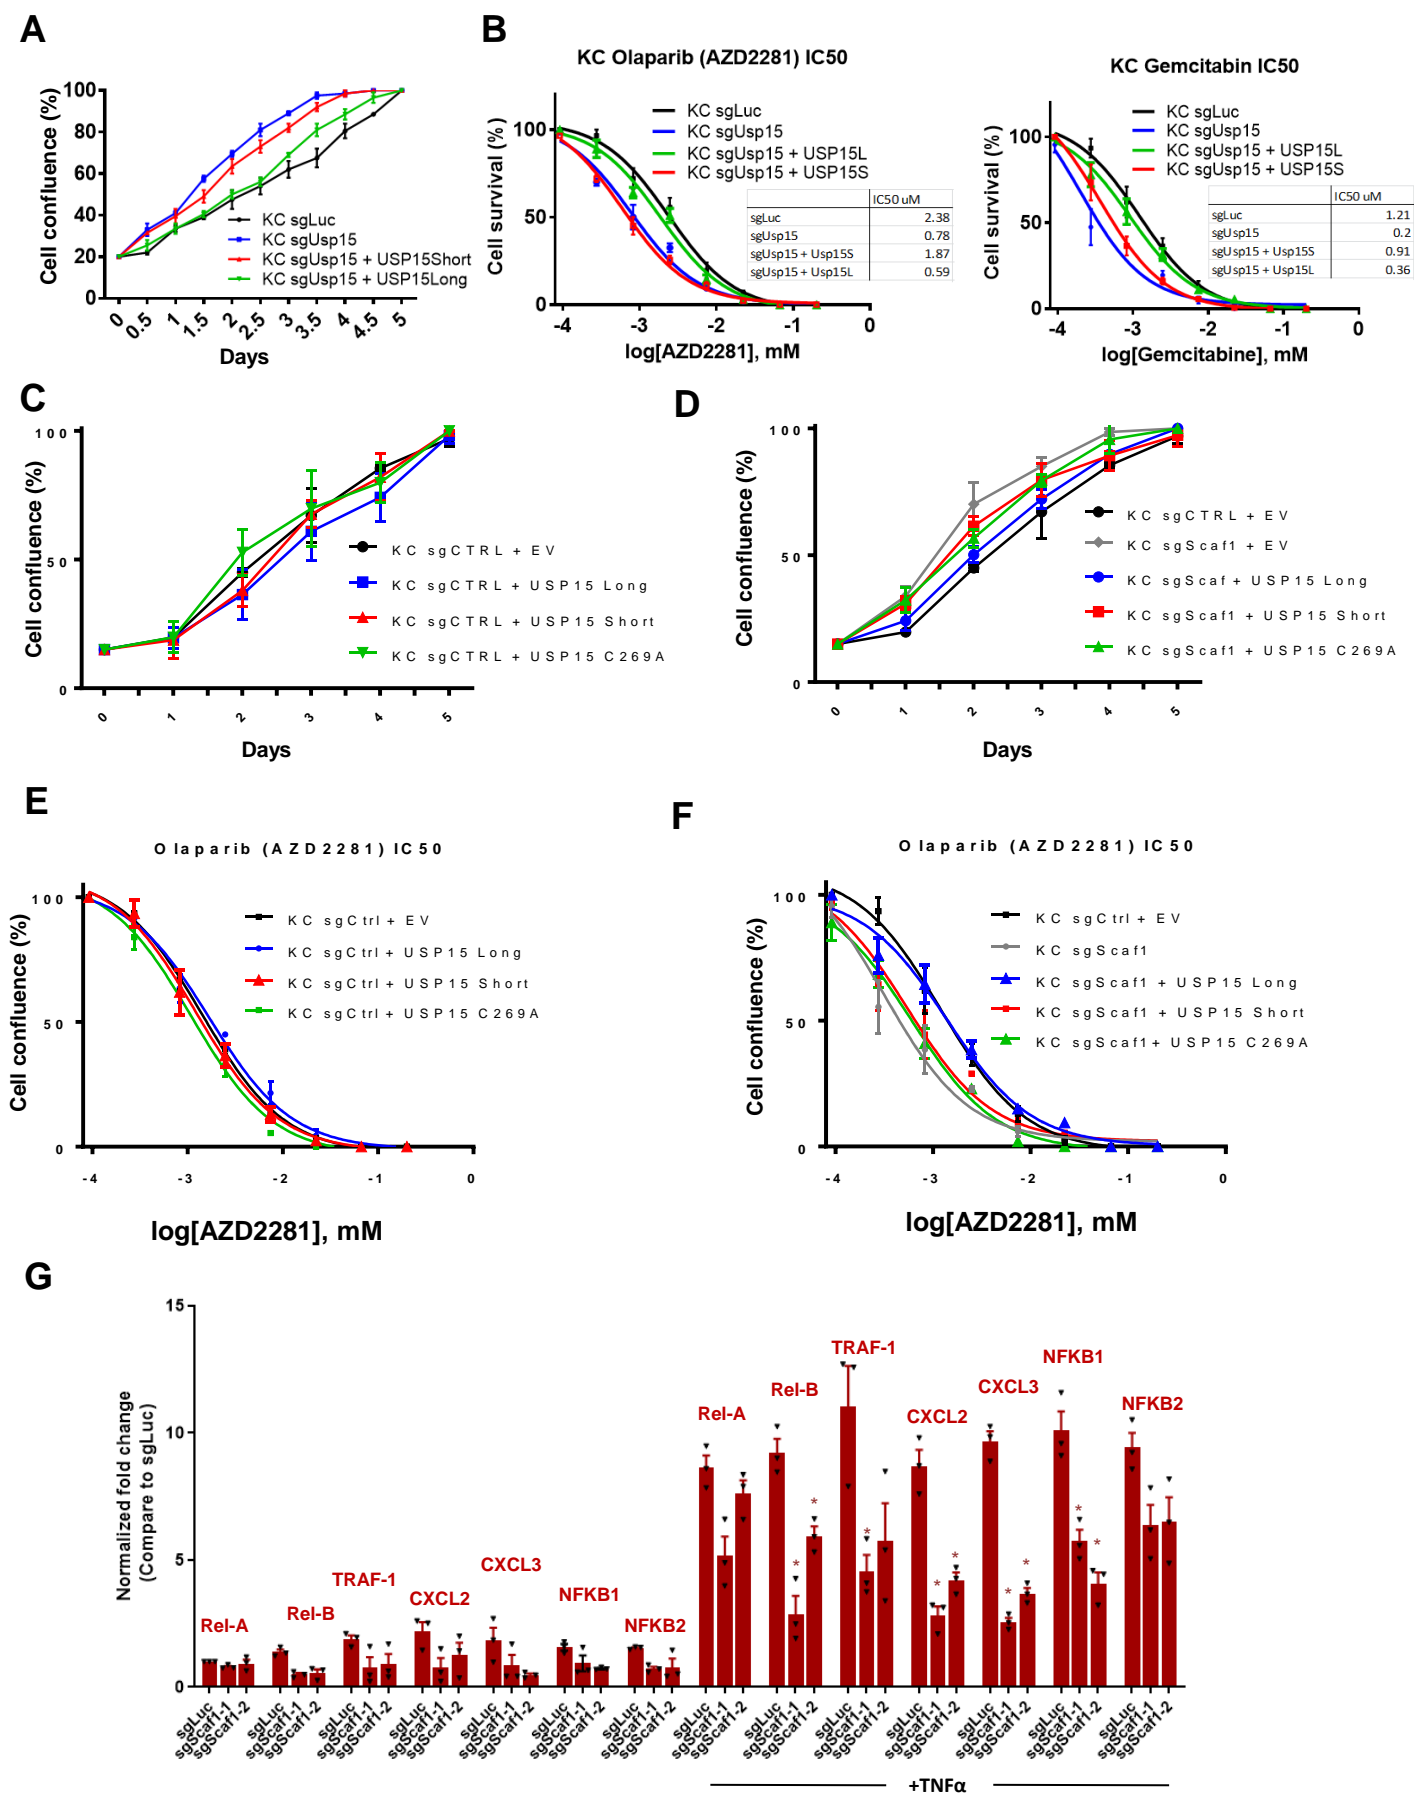

Supplementary Figure 7. *SCAF1* is a *bona-fide* PDAC suppressor

### **Supplementary Figure 7. SCAF1 is a *bona-fide* PDAC suppressor**

**A**, Cell growth curves of KC cells transduced with the indicated sgRNAs and USP15 expression constructs. Data are expressed as cell confluence percentage (%; mean  $\pm$  SD, n = 3 independent experiments). Two-way ANOVA, Dunnett's multiple comparison **B**, Dose-response curves of KC cells transduced with the indicated sgRNAs and USP15 expression constructs and treated with Gemcitabine or olaparib in cell proliferation assay (%; mean  $\pm$  SD, n = 3 independent experiments). Two-way ANOVA, Dunnett's multiple comparison **C**. Cell growth curves of KC transduced with the indicated sgRNA and USP15 expression constructs. Data are expressed as cell confluence percentage (%; mean  $\pm$  SD, n = 3 independent experiments). Two-way ANOVA, Dunnett's multiple comparison **D**. Cell growth curves of KC transduced with the indicated sgRNAs and USP15 expression constructs. Data are expressed as cell confluence percentage (%; mean  $\pm$  SD, n = 3 independent experiments). Two-way ANOVA, Dunnett's multiple comparison **E**. Dose-response curves of KC cells transduced with the indicated sgRNAs and USP15 expression constructs and treated with olaparib in cell proliferation assay (%; mean  $\pm$  SD, n = 3 independent experiments). Two-way ANOVA, Dunnett's multiple comparison **F**. Dose-response curves for KC cells transduced with the indicated sgRNAs and USP15 expression constructs and treated with olaparib in cell proliferation assay (%; mean  $\pm$  SD, n = 3 independent experiments). Two-way ANOVA, Dunnett's multiple comparison **G**, Expression levels of genes related to TNF $\alpha$  signaling assessed by RT-qPCR. Results were normalized with Gapdh and are expressed in fold change to CTR (mean  $\pm$  SEM, n = 3 independent experiments). Cells were incubated with 10 ng/mL TGF $\beta$  -for 30 min. Two-tailed T-test (Rel-B p=0.027/p=0.034 TRAF-1 p=0.031; CXCL2 p=0.022/p=0.029; CXCL3 p=0.018/p=0.021 ; NFKB1 p=0.031/p=0.026).

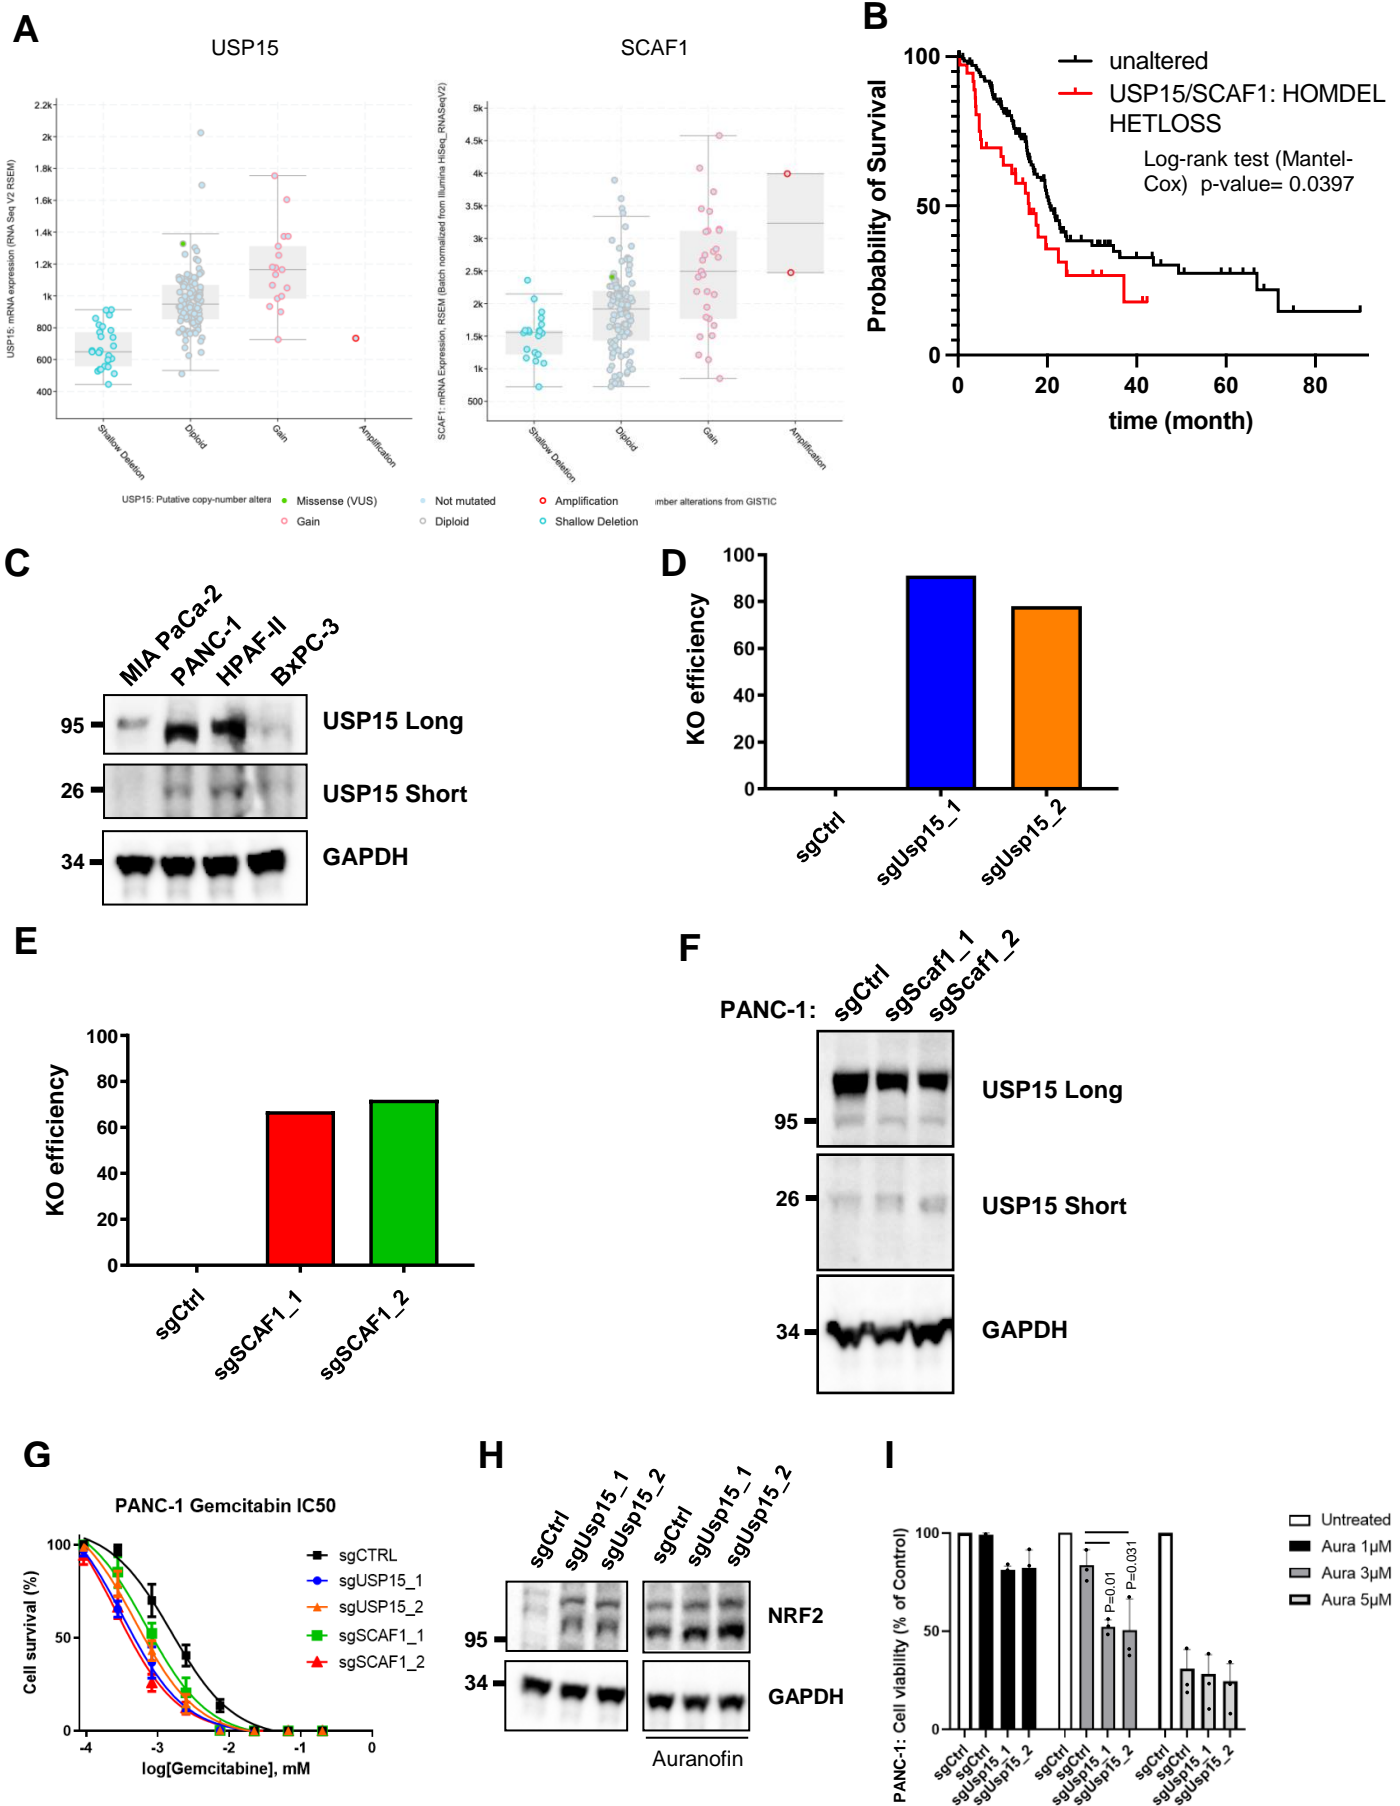



### **Supplementary Figure 8. *USP15* and *SCAF1* in human cancers**

**A**, *USP15* and *SCAF1* mRNA expression in human PDAC samples (n= 293, TCGA) according to putative copy number alteration. **B**, Kaplan-Meier survival analyses of PDAC patients with deep or shallow *USP15* or *SCAF1* deletion considered as a group (37% of patients, n= 293, TCGA). Log-Rank test (Mantel-Cox) **C**, Western blot analysis showing *USP15* long and short isoforms in MIA PaCa-2, PANC-1, HPAF-II and BxPC-3 human PDAC cell lines. **D**, Gene editing efficiency of sg*USP15* in PANC-1 cells. **E**, Gene editing efficiency of sg*SCAF1* in PANC-1 cells. **F**, Western blot analysis showing *USP15* long and short isoforms in PANC-1 sg*Scaf1* cells. **G**, Dose-response curves for sgCtrl, sg*Usp15* or sg*SCAF1* PANC-1 cells treated with Gemcitabin (%; mean  $\pm$  SD, n = 3 independent experiments). two-way ANOVA, Dunnett's multiple comparison **H**, Western blot analysis showing NFR2 expression in KC sgCtrl and sg*Usp15* upon Auranofin treatment (3 $\mu$ M; 24h) **I**. KC sgCtrl and sg*Usp15* cells were treated with indicated concentration of Auranofin for 24h. Cell survival was determined by PrestoBlue™ Cell Viability Reagent (mean  $\pm$  SD, n = 3 independent experiments) Two-tailed T-test.

**A**

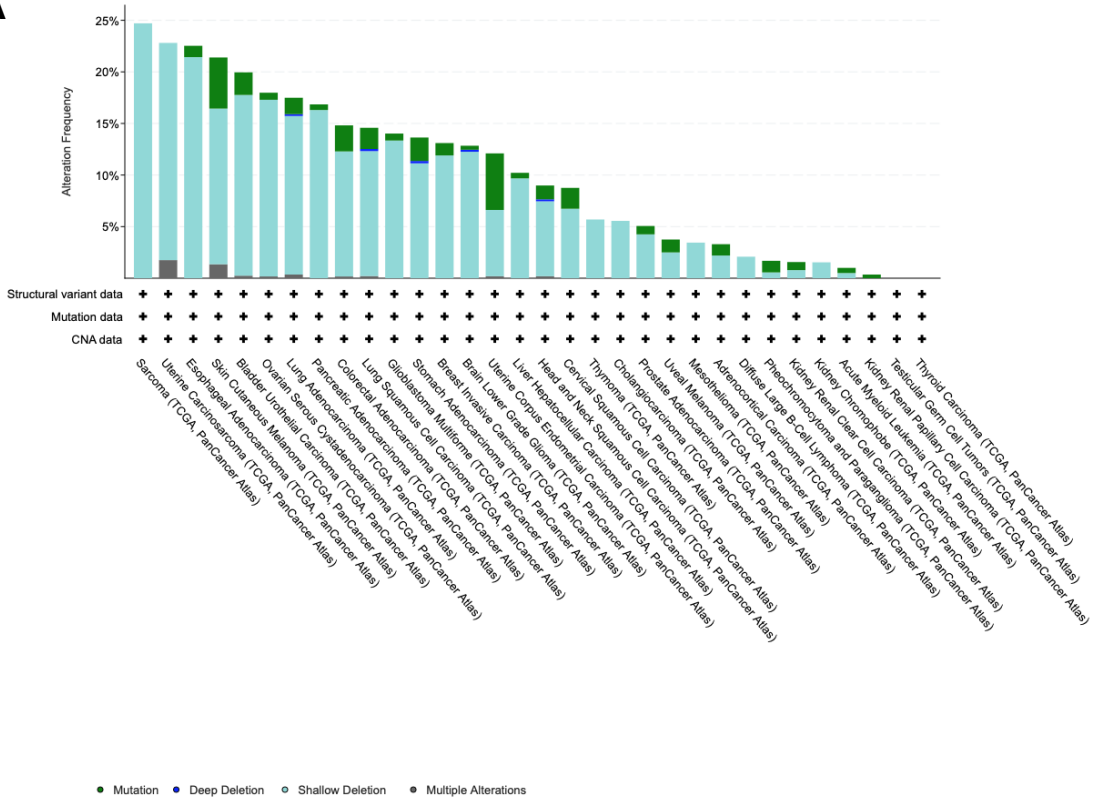

Supplementary Figure 9. *USP15* and *SCAF1* in human cancers

**Supplementary Figure 9. *USP15* and *SCAF1* in human cancers**

**A.** Bar graph showing *USP15* alteration frequency in other cancers (TCAG).

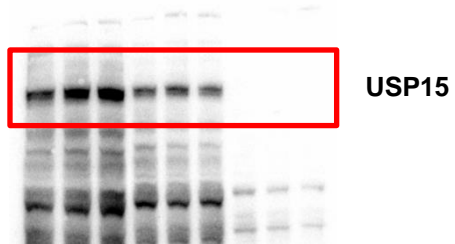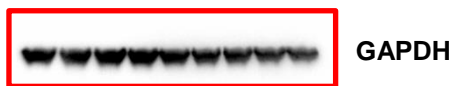

Supp Fig 2.C

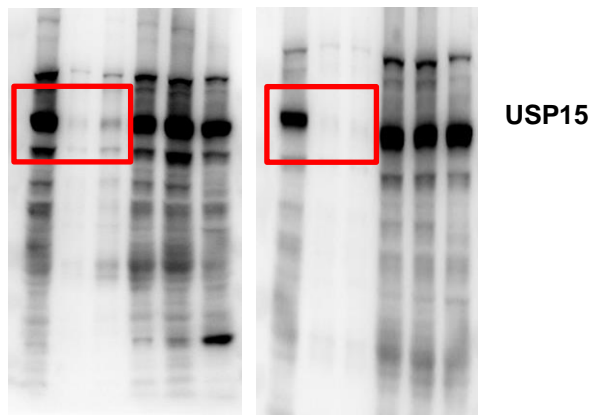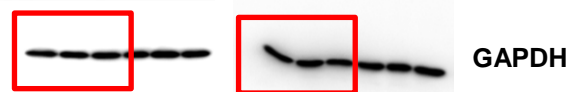

Supp Fig 2.D

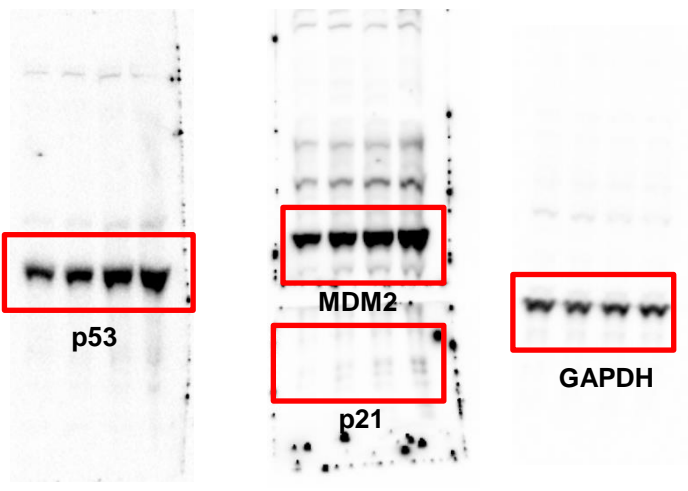

Supp Fig 2.F

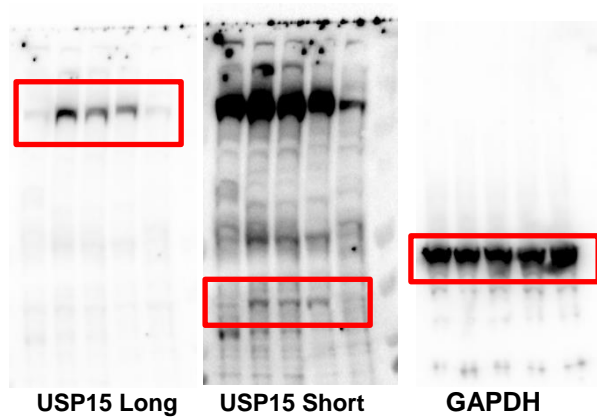

Supp Fig 4.D

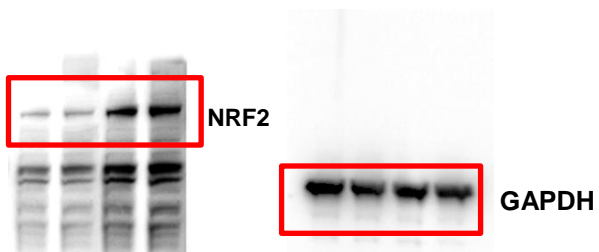

Supp Fig 5.A

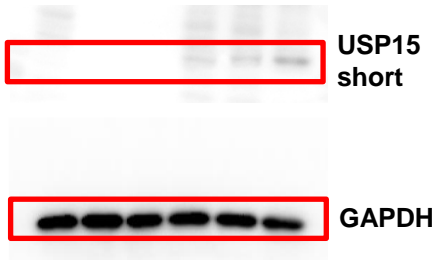

Supp Fig 6.F

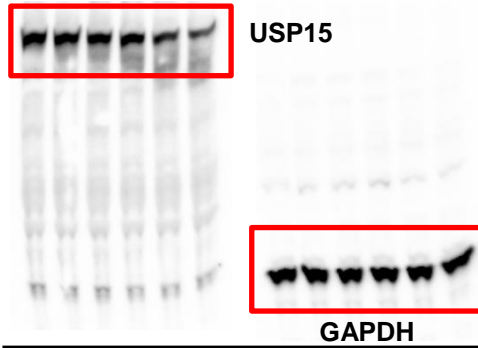

Supp Fig 6.G

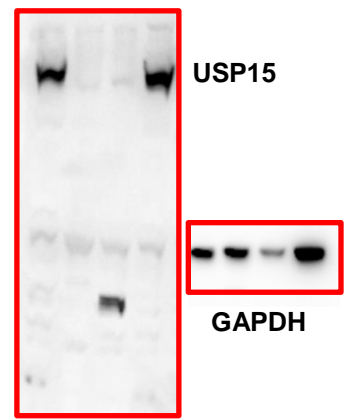

Supp Fig 6.H

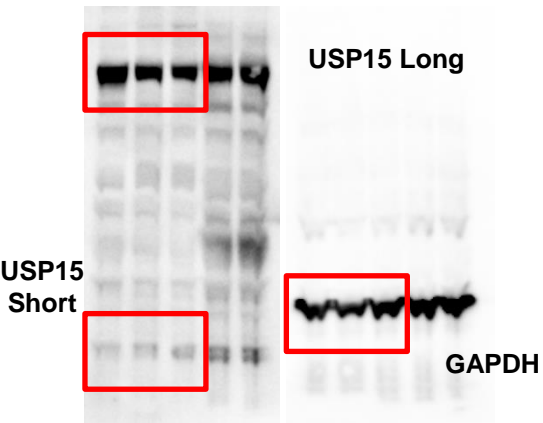

Supp Fig 8.C

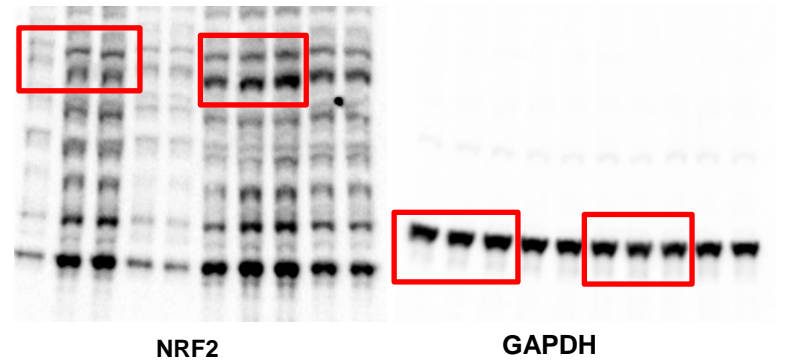

Supp Fig 8.F

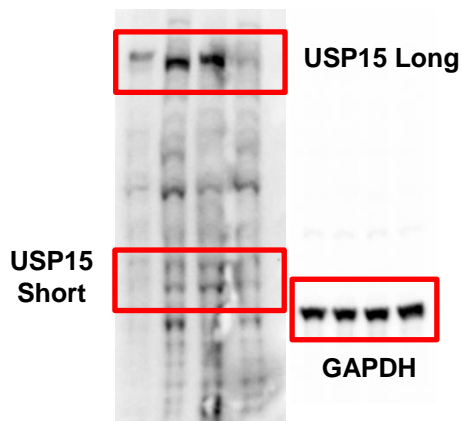

Supp Fig 8.H
