# Supplementary material for: In vivo CRISPR screens reveal SCAF1 and USP15 as drivers of pancreatic cancer
Source: PubMed Central journal article supplement (PMC11189927; doi:10.1038/s41467-024-49450-3), 2024-06-20
Supplement: 41467_2024_49450_MOESM4_ESM.pdf [file 41467_2024_49450_MOESM4_ESM.pdf]

### **Supplementary Data files 1. PDAC sgRNA library and non-targeting library.**

List of sgRNAs targeting pancreatic cancer long tail genes ordered as a pooled oligo chip (CustomArray Inc., USA) and cloned into AAV sgRNA-H2B-RFP engineered from AAV:ITR-U6-sgRNA(backbone)-pCBh-Cre-WPRE-hGHpA-ITR kindly provided by Feng Zhang (Addgene plasmid #60229). PDAC library sgRNAs were obtained from Hart *et al.*,<sup>71</sup> (4 sgRNAs/gene) and non-targeting sgRNAs were obtained from Sanjana *et al.*,<sup>72</sup>

### **Supplementary Data files 2. Candidate genes**

List of identified PDAC driver genes with enriched sgRNAs in tumor DNA obtained from the PDAC mouse model (targeted by  $\geq 2$  sgRNAs), in multiple tumors and/or metastatic foci.

### **Supplementary Data files 3. DEG and GSEA**

Differentially expressed genes (DEG) (false discovery rate (FDR, Benjamini-Hochberg)  $< 0.05$  and absolute  $\log_2$  fold-change  $> 1$ ), and Gene set enrichment analyses (GSEA) of sgUsp15 and sgScaf1 compared to KC cells sgCtrl.

### **Supplementary Data files 4. GSEA olaparib**

Gene set enrichment analyses (GSEA) of sgUsp15 and sgScaf1 compared to KC cells sgCtrl upon Olaparib treatment.

### **Supplementary Data files 5. Primers – gRNA**

List of sgRNAs and primers used in the manuscript.
